# Supplementary material for: Frequency of mutations in BRAF, NRAS, and KIT in different populations and histological subtypes of melanoma: a systemic review
Source: PubMed Central journal article supplement (PMC6940026; doi:10.1097/cmr.0000000000000628), 2019-07-03
Supplement: mr-30-62-s001.pdf [file mr-30-62-s001.pdf]

## Supplement 1. Strategy for database search

### Pubmed

- (melanoma [MeSH Terms]AND ((NRAS[Title/Abstract] OR (N-RAS[Title/Abstract])) AND ((BRAF [Title/Abstract] OR (B-RAF [Title/Abstract])) AND ((Mutation [Text Word] OR Mutatio\*[Text Word]) OR (OR mutat\*\*[Text Word])) AND ((C-KIT[Title/Abstract] OR KIT[Title/Abstract]))
- (melanoma [MeSH Terms]) AND ((Mutation [Text Word] OR Mutatio\*[Text Word]) OR (OR mutat\*\*[Text Word])) AND ((NRAS[Title/Abstract] OR N-RAS[Title/Abstract])).
- (melanoma [MeSH Terms]) AND ((BRAF [Title/Abstract] OR (B-RAF [Title/Abstract])) AND ((Mutation [Text Word] OR Mutatio\*[Text Word]) OR (OR mutat\*\*[Text Word]))
- (melanoma [MeSH Terms] AND ((C-KIT[Title/Abstract] OR KIT[Title/Abstract])) AND ((Mutation [Text Word] OR Mutatio\*[Text Word]) OR (OR mutat\*\*[Text Word]))).

### Science direct

- Melanoma AND Mutation (B-RAF OR BRAF) AND (NRAS or N-RAS) AND (C-KIT OR KIT)

### MEDLINE

- Melanoma AND mutation AND (B-RAF OR BRAF) AND (NRAS or N-RAS) AND (C-KIT OR KIT),  
Melanoma AND mutation AND BRAF OR B-RAF, Melanoma AND mutation AND NRAS OR N-RAS,  
Melanoma AND mutation AND KIT OR C-KIT

### Google scholar (alert service)

- Melanoma| BRAF| B-RAF| NRAS| N-RAS| KIT| C-KIT| mutation| mutat

### Scielo

- Melanoma AND BRAF OR B-RAF
- Melanoma AND NRAS OR N-RAS
- Melanoma AND KIT OR c-KIT
- Melanoma
